# Supplementary material for: Efficacy of pharmacological interventions: a systematic review informing the 2023 EULAR recommendations for the management of fatigue in people with inflammatory rheumatic and musculoskeletal diseases
Source: PubMed Central journal article supplement — RMD Open. 2023 Dec 6;9(4):e003349. doi: 10.1136/rmdopen-2023-003349 (PMC10711909; doi:10.1136/rmdopen-2023-003349), 2023-12-06

## Online supplementary material S4: Meta-analysis

### Comparison 1. Adalimumab versus placebo

#### Analysis 1.1. Adalimumab 40mg versus placebo in Rheumatoid Arthritis at 52 weeks.

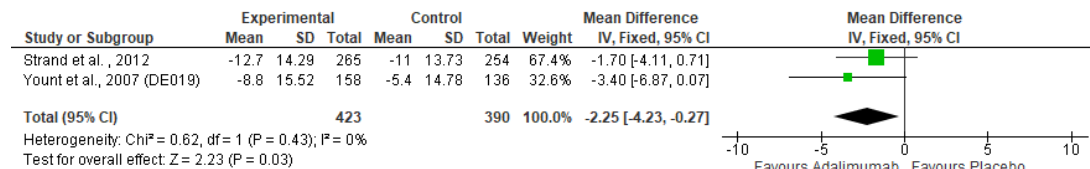

#### Analysis 1.2. Adalimumab 40mg versus placebo in Rheumatoid Arthritis at 12 weeks.

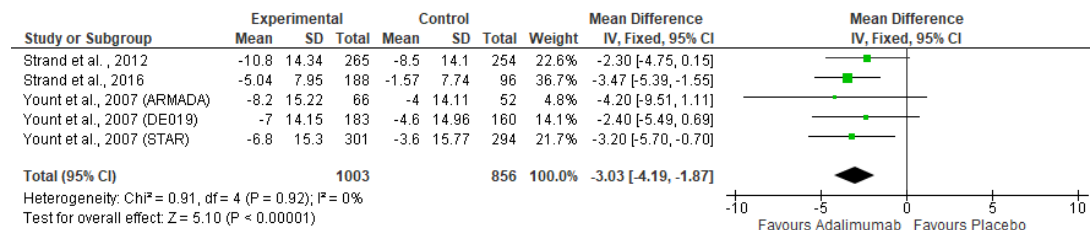

#### Analysis 1.3. Adalimumab 40mg versus placebo in Psoriatic Arthritis at 12 weeks.

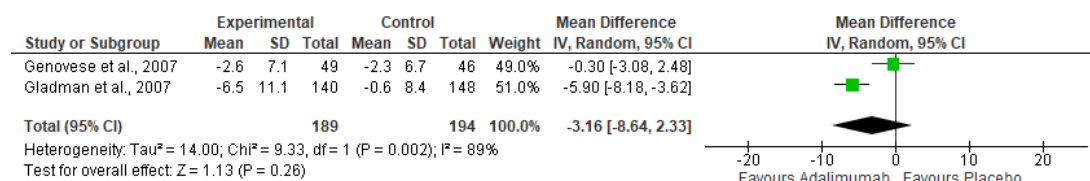

### Comparison 2. Baricitinib versus placebo

#### Analysis 2.1. Baricitinib 4mg versus placebo in Rheumatoid Arthritis at 24 weeks.

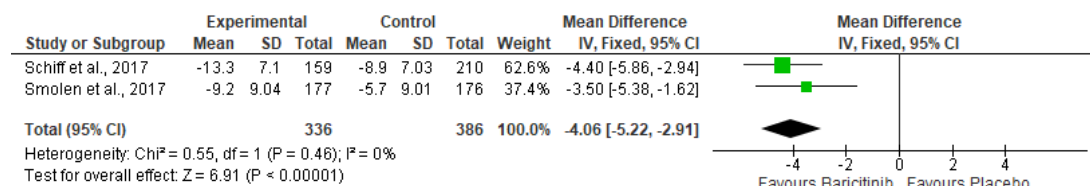

### Comparison 3. Sarilumab versus placebo

#### Analysis 3.1. Sarilumab versus placebo in Rheumatoid Arthritis at 24 weeks.

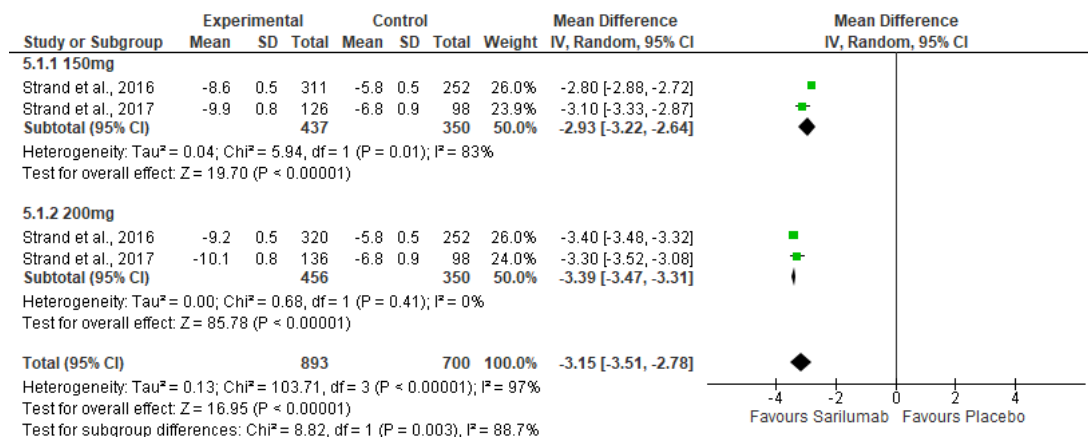

### Comparison 4. Tocilizumab versus placebo

#### Analysis 4.1. Tocilizumab versus placebo in Rheumatoid Arthritis at 24 weeks.

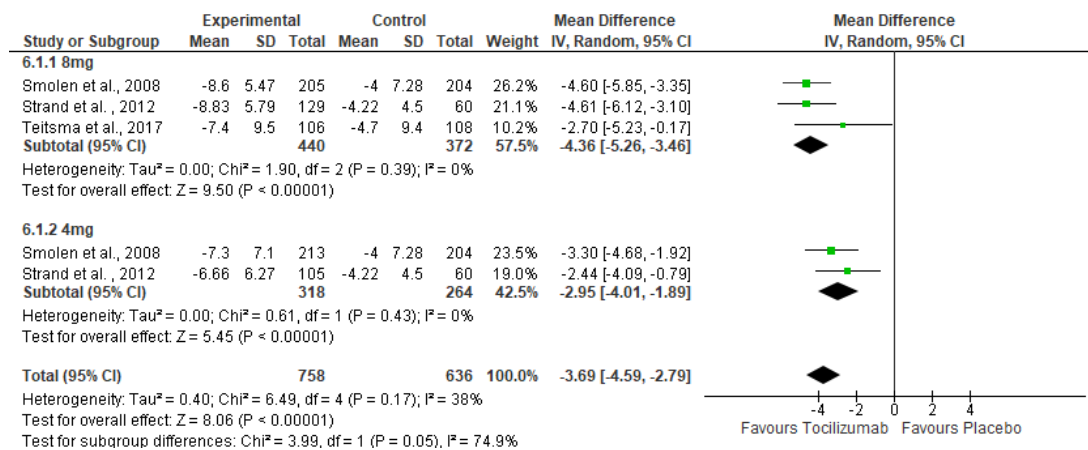

## Comparison 5. Golimumab versus placebo

### Analysis 5.1. Golimumab 100mg versus placebo in Rheumatoid Arthritis at 24 weeks.

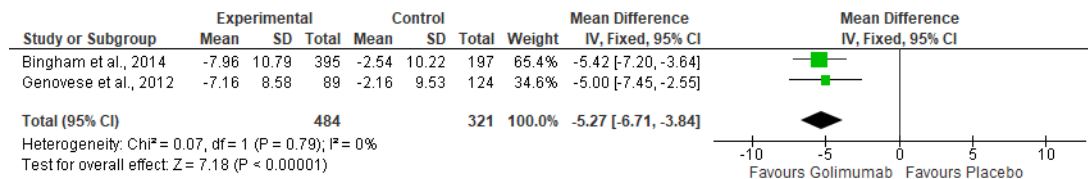

## Comparison 6. Tofacitinib versus placebo

### Analysis 6.1. Tofacitinib versus placebo in Rheumatoid Arthritis at 12 weeks.

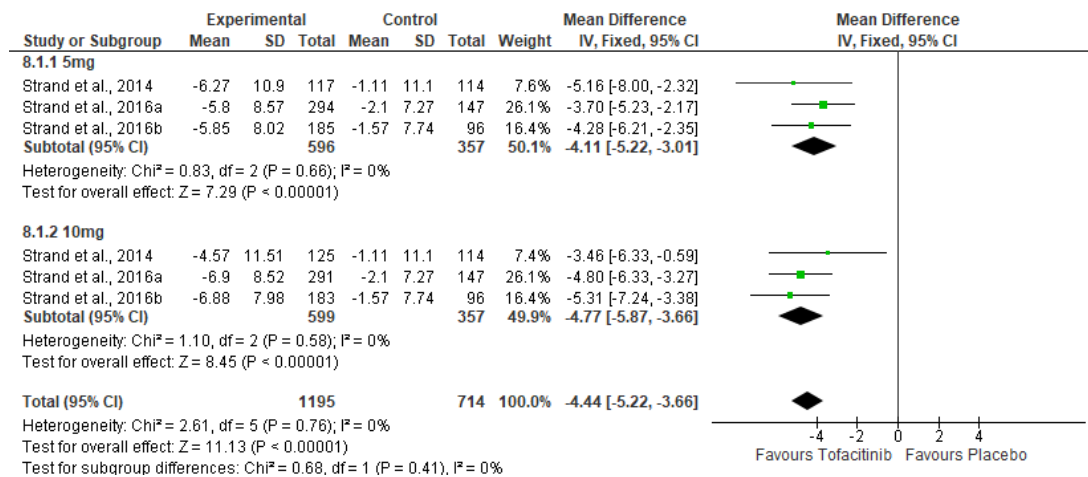

## Comparison 7. Secukinumab versus placebo

### Analysis 7.1. Secukinumab versus placebo in Spondyloarthritis at 16 weeks.

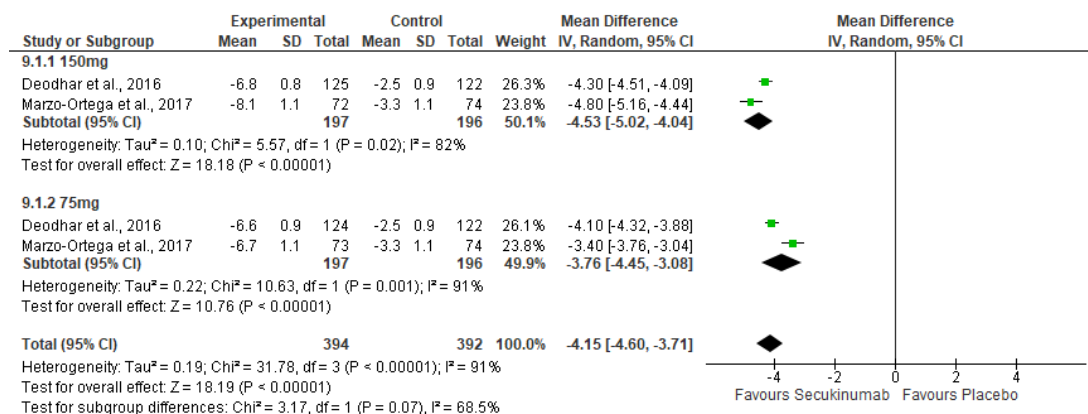

## Comparison 8. Etanercept versus placebo

### Analysis 8.1. Etanercept 50mg versus placebo in Spondyloarthritis at 12 weeks.

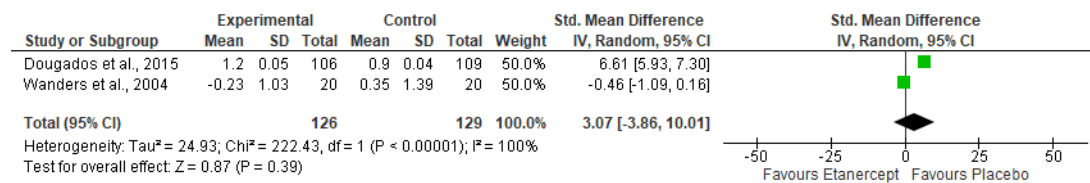

Supplement: rmdopen-2023-003349supp004.pdf [file rmdopen-2023-003349supp004.pdf]
