# Supplementary material for: Efficacy of pharmacological interventions: a systematic review informing the 2023 EULAR recommendations for the management of fatigue in people with inflammatory rheumatic and musculoskeletal diseases
Source: PubMed Central journal article supplement — RMD Open. 2023 Dec 6;9(4):e003349. doi: 10.1136/rmdopen-2023-003349 (PMC10711909; doi:10.1136/rmdopen-2023-003349), 2023-12-06
Supplement: rmdopen-2023-003349supp001.pdf [file rmdopen-2023-003349supp001.pdf]

## Online supplementary material S1: Search strategies

PubMed: Searched on 27<sup>th</sup> December 2021

| ID | Search Terms                                                                                                                                                                                                                                                                                                                                                                                                                                                                                                                                                                                                                                                                                                                                                                                                                                                                                                                                                                                                                                                                                                                                                                                                                                                                                                                                                                                                                                                                                                                                                                                          | Results   |
|----|-------------------------------------------------------------------------------------------------------------------------------------------------------------------------------------------------------------------------------------------------------------------------------------------------------------------------------------------------------------------------------------------------------------------------------------------------------------------------------------------------------------------------------------------------------------------------------------------------------------------------------------------------------------------------------------------------------------------------------------------------------------------------------------------------------------------------------------------------------------------------------------------------------------------------------------------------------------------------------------------------------------------------------------------------------------------------------------------------------------------------------------------------------------------------------------------------------------------------------------------------------------------------------------------------------------------------------------------------------------------------------------------------------------------------------------------------------------------------------------------------------------------------------------------------------------------------------------------------------|-----------|
| #1 | "rheumat**"[Title/Abstract] OR "reumat**"[Title/Abstract] OR "arthrit**"[Title/Abstract] OR "artrit**"[Title/Abstract] OR "arthritis, rheumatoid"[MeSH Terms] OR "psoriatic**"[Title/Abstract] OR "arthritis, psoriatic"[MeSH Terms] OR "spondylitis**"[Title/Abstract] OR "spondyloarthropat**"[Title/Abstract] OR "spondyloarthritis"[Title/Abstract] OR "spondylitis, ankylosing"[MeSH Terms] OR "gout**"[Title/Abstract] OR "gout"[MeSH Terms] OR "systemic lupus erythematosus"[Title/Abstract] OR "lupus**"[Title/Abstract] OR "lupus erythematosus, systemic"[MeSH Terms] OR "scleroderma**"[Title/Abstract] OR "systemic sclerosis"[Title/Abstract] OR "scleroderma, systemic"[MeSH Terms] OR "sjogren**"[Title/Abstract] OR "sjogren s syndrome"[MeSH Terms] OR "myositis"[Title/Abstract] OR "myositis"[MeSH Terms] OR "dermatomyositis"[Title/Abstract] OR "polymyositis"[Title/Abstract] OR "immune-mediated necrotising myopathy"[Title/Abstract] OR "anti-synthetase syndrome"[Title/Abstract] OR "inclusion body myositis"[Title/Abstract] OR "vasculitis**"[Title/Abstract] OR "vasculitis, central nervous system"[MeSH Terms] OR "giant cell arteritis"[Title/Abstract] OR "Takayasu's arteritis"[Title/Abstract] OR "polymyalgia rheumatica"[Title/Abstract] OR "polyarteritis nodosa"[Title/Abstract] OR "granulomatosis with polyangiitis"[Title/Abstract] OR "microscopic polyangiitis"[Title/Abstract] OR "eosinophilic granulomatosis with polyangiitis"[Title/Abstract] OR "Behçet syndrome"[Title/Abstract] OR "Wegener"[Title/Abstract] OR "Churg-Strauss"[Title/Abstract] | 507,499   |
| #2 | "non pharmacological**"[Title/Abstract] OR "non surgical intervention**"[Title/Abstract] OR "physical activity"[Title/Abstract] OR "exercise"[Title/Abstract] OR "occupational therapy"[Title/Abstract] OR "electro-physical modalities"[Title/Abstract] OR "thermotherapy"[Title/Abstract] OR "electrotherapy"[Title/Abstract] OR "manual therapies"[Title/Abstract] OR "massage"[Title/Abstract] OR "orthoses"[Title/Abstract] OR "aids"[Title/Abstract] OR "devices"[Title/Abstract] OR "psychosocial interventions"[Title/Abstract] OR "Cognitive Behavioral Therapy"[Title/Abstract] OR "Cognitive Behavioral Therapy"[MeSH Terms] OR "balneotherapy"[Title/Abstract] OR "tai chi"[Title/Abstract] OR "acupuncture"[Title/Abstract] OR "electroacupuncture"[Title/Abstract] OR "low level laser therapy"[Title/Abstract] OR "tai ji"[Title/Abstract] OR "Low-Level Light Therapy"[Title/Abstract] OR "tai ji"[MeSH Terms] OR "acupuncture therapy"[MeSH Terms] OR "Low-Level Light Therapy"[MeSH Terms] OR "balneology"[MeSH Terms] OR "occupational therapy"[MeSH Terms] OR "massage"[MeSH Terms] OR "electric stimulation therapy"[MeSH Terms] OR "hyperthermia, induced"[MeSH Terms] OR "exercise"[MeSH Terms] OR "pharmacological**"[Title/Abstract] OR "biological therapy"[MeSH Terms] OR "drug therapy"[MeSH Terms] OR "antibodies, monoclonal"[MeSH Terms] OR "monokines"[MeSH Terms] OR "receptors, interleukin 1"[MeSH Terms] OR "receptors,                                                                                                                                           | 5,797,249 |

|    |                                                                                                                                                                                                                                                                                                                                                                                                                                                                                                                                                                                                                                                                                                                                                                                                                                                                                                                                                                                                                                                                                                                                                                                                                                                                                                                                                                                                                                                                                                                                                                                                                                                                                                                                                                                                                                                                                                                                                                                                                                                                                                                                                                                               |           |
|----|-----------------------------------------------------------------------------------------------------------------------------------------------------------------------------------------------------------------------------------------------------------------------------------------------------------------------------------------------------------------------------------------------------------------------------------------------------------------------------------------------------------------------------------------------------------------------------------------------------------------------------------------------------------------------------------------------------------------------------------------------------------------------------------------------------------------------------------------------------------------------------------------------------------------------------------------------------------------------------------------------------------------------------------------------------------------------------------------------------------------------------------------------------------------------------------------------------------------------------------------------------------------------------------------------------------------------------------------------------------------------------------------------------------------------------------------------------------------------------------------------------------------------------------------------------------------------------------------------------------------------------------------------------------------------------------------------------------------------------------------------------------------------------------------------------------------------------------------------------------------------------------------------------------------------------------------------------------------------------------------------------------------------------------------------------------------------------------------------------------------------------------------------------------------------------------------------|-----------|
|    | interleukin 6"[MeSH Terms] OR "immunoglobulin g"[MeSH Terms] OR "immunoconjugates"[MeSH Terms] OR "polyethylene glycols"[MeSH Terms] OR "immunoglobulin fab fragments"[MeSH Terms] OR "t lymphocytes"[MeSH Terms] OR "biologic*"[Title/Abstract] OR "bdmard*"[Title/Abstract] OR "biosimilar*"[Title/Abstract] OR "safe*"[Title/Abstract] OR "side effect*"[Title/Abstract]                                                                                                                                                                                                                                                                                                                                                                                                                                                                                                                                                                                                                                                                                                                                                                                                                                                                                                                                                                                                                                                                                                                                                                                                                                                                                                                                                                                                                                                                                                                                                                                                                                                                                                                                                                                                                   |           |
| #3 | "fatigue*"[Title/Abstract] OR "tired*"[Title/Abstract] OR "weary"[Title/Abstract] OR "weariness"[Title/Abstract] OR "exhaust*"[Title/Abstract] OR "asthenia"[Title/Abstract] OR "asthenia"[MeSH Terms] OR "asthen*"[Title/Abstract] OR "apath*"[Title/Abstract] OR "weak*"[Title/Abstract] OR "letharg*"[All Fields] OR "fatigue"[MeSH Terms]                                                                                                                                                                                                                                                                                                                                                                                                                                                                                                                                                                                                                                                                                                                                                                                                                                                                                                                                                                                                                                                                                                                                                                                                                                                                                                                                                                                                                                                                                                                                                                                                                                                                                                                                                                                                                                                 | 630,53    |
| #4 | ((("randomized controlled trial"[Publication Type] OR "controlled clinical trial"[Publication Type] OR "placebo"[Title/Abstract] OR "drug therapy"[MeSH Subheading] OR "randomly"[Title/Abstract] OR "trial"[Title/Abstract]) NOT ("animals"[MeSH Terms] NOT ("animals"[MeSH Terms] AND "humans"[MeSH Terms]))) OR "systematic"[Filter] OR "cohort studies"[MeSH Terms] OR "case-control studies"[MeSH Terms] OR "comparative study"[Publication Type] OR "cohort"[Title/Abstract] OR "compared"[Title/Abstract] OR "case control"[Title/Abstract]                                                                                                                                                                                                                                                                                                                                                                                                                                                                                                                                                                                                                                                                                                                                                                                                                                                                                                                                                                                                                                                                                                                                                                                                                                                                                                                                                                                                                                                                                                                                                                                                                                            | 9,067,470 |
| #5 | ((("rheumat*"[Title/Abstract] OR "reumat*"[Title/Abstract] OR "arthrit*"[Title/Abstract] OR "artrit*"[Title/Abstract] OR "arthritis, rheumatoid"[MeSH Terms] OR "psoriatic*"[Title/Abstract] OR "arthritis, psoriatic"[MeSH Terms] OR "spondylitis*"[Title/Abstract] OR "spondyloarthropat*"[Title/Abstract] OR "spondyloarthritis"[Title/Abstract] OR "spondylitis, ankylosing"[MeSH Terms] OR "gout*"[Title/Abstract] OR "gout"[MeSH Terms] OR "systemic lupus erythematosus"[Title/Abstract] OR "lupus*"[Title/Abstract] OR "lupus erythematosus, systemic"[MeSH Terms] OR "scleroderma*"[Title/Abstract] OR "systemic sclerosis"[Title/Abstract] OR "scleroderma, systemic"[MeSH Terms] OR "sjogren*"[Title/Abstract] OR "sjogren s syndrome"[MeSH Terms] OR "myositis"[Title/Abstract] OR "myositis"[MeSH Terms] OR "dermatomyositis"[Title/Abstract] OR "polymyositis"[Title/Abstract] OR "immune-mediated necrotising myopathy"[Title/Abstract] OR "anti-synthetase syndrome"[Title/Abstract] OR "inclusion body myositis"[Title/Abstract] OR "vasculitis*"[Title/Abstract] OR "vasculitis, central nervous system"[MeSH Terms] OR "giant cell arteritis"[Title/Abstract] OR "Takayasu's arteritis"[Title/Abstract] OR "polymyalgia rheumatica"[Title/Abstract] OR "polyarteritis nodosa"[Title/Abstract] OR "granulomatosis with polyangiitis"[Title/Abstract] OR "microscopic polyangiitis"[Title/Abstract] OR "eosinophilic granulomatosis with polyangiitis"[Title/Abstract] OR "Behçet syndrome"[Title/Abstract] OR "Wegener"[Title/Abstract] OR "Churg-Strauss"[Title/Abstract]) AND ("non pharmacological*"[Title/Abstract] OR "non surgical intervention*"[Title/Abstract] OR "physical activity"[Title/Abstract] OR "exercise"[Title/Abstract] OR "occupational therapy"[Title/Abstract] OR "electro-physical modalities"[Title/Abstract] OR "thermotherapy"[Title/Abstract] OR "electrotherapy"[Title/Abstract] OR "manual therapies"[Title/Abstract] OR "massage"[Title/Abstract] OR "orthoses"[Title/Abstract] OR "aids"[Title/Abstract] OR "devices"[Title/Abstract] OR "psychosocial interventions"[Title/Abstract] OR "Cognitive Behavioral Therapy"[Title/Abstract] OR | 2,610     |

|    |                                                                                                                                                                                                                                                                                                                                                                                                                                                                                                                                                                                                                                                                                                                                                                                                                                                                                                                                                                                                                                                                                                                                                                                                                                                                                                                                                                                                                                                                                                                                                                                                                                                                                                                                                                                                                                                                                                                                                                                                                                                                                                                                                                  |       |
|----|------------------------------------------------------------------------------------------------------------------------------------------------------------------------------------------------------------------------------------------------------------------------------------------------------------------------------------------------------------------------------------------------------------------------------------------------------------------------------------------------------------------------------------------------------------------------------------------------------------------------------------------------------------------------------------------------------------------------------------------------------------------------------------------------------------------------------------------------------------------------------------------------------------------------------------------------------------------------------------------------------------------------------------------------------------------------------------------------------------------------------------------------------------------------------------------------------------------------------------------------------------------------------------------------------------------------------------------------------------------------------------------------------------------------------------------------------------------------------------------------------------------------------------------------------------------------------------------------------------------------------------------------------------------------------------------------------------------------------------------------------------------------------------------------------------------------------------------------------------------------------------------------------------------------------------------------------------------------------------------------------------------------------------------------------------------------------------------------------------------------------------------------------------------|-------|
|    | <p>"Cognitive Behavioral Therapy"[MeSH Terms] OR "balneotherapy"[Title/Abstract] OR "tai chi"[Title/Abstract] OR "acupuncture"[Title/Abstract] OR "electroacupuncture"[Title/Abstract] OR "low level laser therapy"[Title/Abstract] OR "tai ji"[Title/Abstract] OR "Low-Level Light Therapy"[Title/Abstract] OR "tai ji"[MeSH Terms] OR "acupuncture therapy"[MeSH Terms] OR "Low-Level Light Therapy"[MeSH Terms] OR "balneology"[MeSH Terms] OR "occupational therapy"[MeSH Terms] OR "massage"[MeSH Terms] OR "electric stimulation therapy"[MeSH Terms] OR "hyperthermia, induced"[MeSH Terms] OR "exercise"[MeSH Terms] OR "pharmacological*"[Title/Abstract] OR "biological therapy"[MeSH Terms] OR "drug therapy"[MeSH Terms] OR "antibodies, monoclonal"[MeSH Terms] OR "monokines"[MeSH Terms] OR "receptors, interleukin 1"[MeSH Terms] OR "receptors, interleukin 6"[MeSH Terms] OR "immunoglobulin g"[MeSH Terms] OR "immunoconjugates"[MeSH Terms] OR "polyethylene glycols"[MeSH Terms] OR "immunoglobulin fab fragments"[MeSH Terms] OR "t lymphocytes"[MeSH Terms] OR "biologic*"[Title/Abstract] OR "bdmard*"[Title/Abstract] OR "biosimilar*"[Title/Abstract] OR "safe*"[Title/Abstract] OR "side effect*"[Title/Abstract])) AND ("fatigue*"[Title/Abstract] OR "tired*"[Title/Abstract] OR "weary"[Title/Abstract] OR "weariness"[Title/Abstract] OR "exhaust*"[Title/Abstract] OR "asthenia"[Title/Abstract] OR "asthenia"[MeSH Terms] OR "asthen*"[Title/Abstract] OR "apath*"[Title/Abstract] OR "weak*"[Title/Abstract] OR "letharg*"[All Fields] OR "fatigue"[MeSH Terms])) AND (((("randomized controlled trial"[Publication Type] OR "controlled clinical trial"[Publication Type] OR "placebo"[Title/Abstract] OR "drug therapy"[MeSH Subheading] OR "randomly"[Title/Abstract] OR "trial"[Title/Abstract]) NOT ("animals"[MeSH Terms] NOT ("animals"[MeSH Terms] AND "humans"[MeSH Terms]))) OR "systematic"[Filter] OR "cohort studies"[MeSH Terms] OR "case-control studies"[MeSH Terms] OR "comparative study"[Publication Type] OR "cohort"[Title/Abstract] OR "compared"[Title/Abstract] OR "case control"[Title/Abstract])</p> |       |
| #6 | <p>((("rheumat*"[Title/Abstract] OR "reumat*"[Title/Abstract] OR "arthrit*"[Title/Abstract] OR "artrit*"[Title/Abstract] OR "arthritis, rheumatoid"[MeSH Terms] OR "psoriatic*"[Title/Abstract] OR "arthritis, psoriatic"[MeSH Terms] OR "spondylitis*"[Title/Abstract] OR "spondyloarthropat*"[Title/Abstract] OR "spondyloarthritis"[Title/Abstract] OR "spondylitis, ankylosing"[MeSH Terms] OR "gout*"[Title/Abstract] OR "gout"[MeSH Terms] OR "systemic lupus erythematosus"[Title/Abstract] OR "lupus*"[Title/Abstract] OR "lupus erythematosus, systemic"[MeSH Terms] OR "scleroderma*"[Title/Abstract] OR "systemic sclerosis"[Title/Abstract] OR "scleroderma, systemic"[MeSH Terms] OR "sjogren*"[Title/Abstract] OR "sjogren s syndrome"[MeSH Terms] OR "myositis"[Title/Abstract] OR "myositis"[MeSH Terms] OR "dermatomyositis"[Title/Abstract] OR "polymyositis"[Title/Abstract] OR "immune-mediated necrotising myopathy"[Title/Abstract] OR "anti-synthetase syndrome"[Title/Abstract] OR "inclusion body myositis"[Title/Abstract] OR "vasculitis*"[Title/Abstract] OR "vasculitis, central nervous system"[MeSH Terms] OR "giant cell arteritis"[Title/Abstract] OR "Takayasu's arteritis"[Title/Abstract] OR "polymyalgia rheumatica"[Title/Abstract] OR "polyarteritis nodosa"[Title/Abstract] OR "granulomatosis with polyangiitis"[Title/Abstract] OR "microscopic</p>                                                                                                                                                                                                                                                                                                                                                                                                                                                                                                                                                                                                                                                                                                                                                                    | 2,452 |

|                                                                                                                                                                                                                                                                                                                                                                                                                                                                                                                                                                                                                                                                                                                                                                                                                                                                                                                                                                                                                                                                                                                                                                                                                                                                                                                                                                                                                                                                                                                                                                                                                                                                                                                                                                                                                                                                                                                                                                                                                                                                                                                                                                                                                                                                                                                                                                                                                                                                                                                                                                                                                                                                                                                                                                                                                                                                                                                                                                                                                                                             |
|-------------------------------------------------------------------------------------------------------------------------------------------------------------------------------------------------------------------------------------------------------------------------------------------------------------------------------------------------------------------------------------------------------------------------------------------------------------------------------------------------------------------------------------------------------------------------------------------------------------------------------------------------------------------------------------------------------------------------------------------------------------------------------------------------------------------------------------------------------------------------------------------------------------------------------------------------------------------------------------------------------------------------------------------------------------------------------------------------------------------------------------------------------------------------------------------------------------------------------------------------------------------------------------------------------------------------------------------------------------------------------------------------------------------------------------------------------------------------------------------------------------------------------------------------------------------------------------------------------------------------------------------------------------------------------------------------------------------------------------------------------------------------------------------------------------------------------------------------------------------------------------------------------------------------------------------------------------------------------------------------------------------------------------------------------------------------------------------------------------------------------------------------------------------------------------------------------------------------------------------------------------------------------------------------------------------------------------------------------------------------------------------------------------------------------------------------------------------------------------------------------------------------------------------------------------------------------------------------------------------------------------------------------------------------------------------------------------------------------------------------------------------------------------------------------------------------------------------------------------------------------------------------------------------------------------------------------------------------------------------------------------------------------------------------------------|
| <p>polyangiitis"[Title/Abstract] OR "eosinophilic granulomatosis with polyangiitis"[Title/Abstract] OR "Behcet syndrome"[Title/Abstract] OR "Wegener"[Title/Abstract] OR "Churg-Strauss"[Title/Abstract]) AND ("non pharmacological"[Title/Abstract] OR "non surgical intervention"[Title/Abstract] OR "physical activity"[Title/Abstract] OR "exercise"[Title/Abstract] OR "occupational therapy"[Title/Abstract] OR "electro-physical modalities"[Title/Abstract] OR "thermotherapy"[Title/Abstract] OR "electrotherapy"[Title/Abstract] OR "manual therapies"[Title/Abstract] OR "massage"[Title/Abstract] OR "orthoses"[Title/Abstract] OR "aids"[Title/Abstract] OR "devices"[Title/Abstract] OR "psychosocial interventions"[Title/Abstract] OR "Cognitive Behavioral Therapy"[Title/Abstract] OR "Cognitive Behavioral Therapy"[MeSH Terms] OR "balneotherapy"[Title/Abstract] OR "tai chi"[Title/Abstract] OR "acupuncture"[Title/Abstract] OR "electroacupuncture"[Title/Abstract] OR "low level laser therapy"[Title/Abstract] OR "tai ji"[Title/Abstract] OR "Low-Level Light Therapy"[Title/Abstract] OR "tai ji"[MeSH Terms] OR "acupuncture therapy"[MeSH Terms] OR "Low-Level Light Therapy"[MeSH Terms] OR "balneology"[MeSH Terms] OR "occupational therapy"[MeSH Terms] OR "massage"[MeSH Terms] OR "electric stimulation therapy"[MeSH Terms] OR "hyperthermia, induced"[MeSH Terms] OR "exercise"[MeSH Terms] OR "pharmacological"[Title/Abstract] OR "biological therapy"[MeSH Terms] OR "drug therapy"[MeSH Terms] OR "antibodies, monoclonal"[MeSH Terms] OR "monokines"[MeSH Terms] OR "receptors, interleukin 1"[MeSH Terms] OR "receptors, interleukin 6"[MeSH Terms] OR "immunoglobulin g"[MeSH Terms] OR "immunoconjugates"[MeSH Terms] OR "polyethylene glycols"[MeSH Terms] OR "immunoglobulin fab fragments"[MeSH Terms] OR "t lymphocytes"[MeSH Terms] OR "biologic"[Title/Abstract] OR "bdmard"[Title/Abstract] OR "biosimilar"[Title/Abstract] OR "safe"[Title/Abstract] OR "side effect"[Title/Abstract]) AND ("fatigue"[Title/Abstract] OR "tired"[Title/Abstract] OR "weary"[Title/Abstract] OR "weariness"[Title/Abstract] OR "exhaust"[Title/Abstract] OR "asthenia"[Title/Abstract] OR "asthenia"[MeSH Terms] OR "asthen"[Title/Abstract] OR "apath"[Title/Abstract] OR "weak"[Title/Abstract] OR "letharg"[All Fields] OR "fatigue"[MeSH Terms]) AND (((("randomized controlled trial"[Publication Type] OR "controlled clinical trial"[Publication Type] OR "placebo"[Title/Abstract] OR "drug therapy"[MeSH Subheading] OR "randomly"[Title/Abstract] OR "trial"[Title/Abstract]) NOT ("animals"[MeSH Terms] NOT ("animals"[MeSH Terms] AND "humans"[MeSH Terms]))) OR "systematic"[Filter] OR "cohort studies"[MeSH Terms] OR "case-control studies"[MeSH Terms] OR "comparative study"[Publication Type] OR "cohort"[Title/Abstract] OR "compared"[Title/Abstract] OR "case control"[Title/Abstract])) AND (english[Filter] OR french[Filter] OR portuguese[Filter] OR spanish[Filter] OR turkish[Filter])</p> |
|-------------------------------------------------------------------------------------------------------------------------------------------------------------------------------------------------------------------------------------------------------------------------------------------------------------------------------------------------------------------------------------------------------------------------------------------------------------------------------------------------------------------------------------------------------------------------------------------------------------------------------------------------------------------------------------------------------------------------------------------------------------------------------------------------------------------------------------------------------------------------------------------------------------------------------------------------------------------------------------------------------------------------------------------------------------------------------------------------------------------------------------------------------------------------------------------------------------------------------------------------------------------------------------------------------------------------------------------------------------------------------------------------------------------------------------------------------------------------------------------------------------------------------------------------------------------------------------------------------------------------------------------------------------------------------------------------------------------------------------------------------------------------------------------------------------------------------------------------------------------------------------------------------------------------------------------------------------------------------------------------------------------------------------------------------------------------------------------------------------------------------------------------------------------------------------------------------------------------------------------------------------------------------------------------------------------------------------------------------------------------------------------------------------------------------------------------------------------------------------------------------------------------------------------------------------------------------------------------------------------------------------------------------------------------------------------------------------------------------------------------------------------------------------------------------------------------------------------------------------------------------------------------------------------------------------------------------------------------------------------------------------------------------------------------------------|

**Embase:** Searched on 26<sup>th</sup> December 2021

| ID | Search Terms                                                                                                                                                                                                                                                                                                                                                                                                                                                                                                                                                                                                                                                                                                                                                                                                                                                                                                                                                                                                                                                                                                                                                                                                                                                                                                                                                                                                                                                                                                                                                                                                                                                                                                                                                                                                                                                    | Results |
|----|-----------------------------------------------------------------------------------------------------------------------------------------------------------------------------------------------------------------------------------------------------------------------------------------------------------------------------------------------------------------------------------------------------------------------------------------------------------------------------------------------------------------------------------------------------------------------------------------------------------------------------------------------------------------------------------------------------------------------------------------------------------------------------------------------------------------------------------------------------------------------------------------------------------------------------------------------------------------------------------------------------------------------------------------------------------------------------------------------------------------------------------------------------------------------------------------------------------------------------------------------------------------------------------------------------------------------------------------------------------------------------------------------------------------------------------------------------------------------------------------------------------------------------------------------------------------------------------------------------------------------------------------------------------------------------------------------------------------------------------------------------------------------------------------------------------------------------------------------------------------|---------|
| #1 | ((inflammatory AND rheumatic AND diseases:ab,ti) AND 'rheumatoid arthritis'/exp OR 'rheumatoid arthritis':ab,ti OR 'psoriatic arthritis'/exp OR 'psoriatic arthritis':ab,ti OR 'spondylitis':ab,ti OR 'spondyloarthropat*':ab,ti OR 'spondyloarthritis':ab,ti OR 'ankylosing spondylitis'/exp OR 'gout':ab,ti OR 'gout'/exp OR 'systemic lupus erythematosus':ab,ti OR 'systemic lupus erythematosus'/exp OR 'scleroderma':ab,ti OR 'systemic sclerosis':ab,ti OR 'systemic sclerosis'/exp OR 'sjogren':ab,ti OR 'myositis':ab,ti OR 'dermatomyositis':ab,ti OR 'polymyositis':ab,ti OR 'immune-mediated necrotising myopathy':ab,ti OR 'anti-synthetase syndrome':ab,ti OR 'inclusion body myositis':ab,ti OR 'vasculitis':ab,ti OR 'vasculitis'/exp OR 'giant cell arteritis':ab,ti OR 'takayasu arteritis':ab,ti OR 'polymyalgia rheumatica':ab,ti OR 'polyarteritis nodosa':ab,ti OR 'microscopic polyangiitis':ab,ti OR 'behçet syndrome':ab,ti OR 'Wegener':ab,ti OR 'Churg-Strauss':ab,ti) AND ('non pharmacological':ab,ti OR 'physical activity':ab,ti OR 'exercise':ab,ti OR 'thermotherapy':ab,ti OR 'electrotherapy':ab,ti OR 'manual therapies':ab,ti OR 'orthoses':ab,ti OR 'psychosocial interventions':ab,ti OR 'cognitive behavioral therapy':ab,ti OR 'cognitive behavioral therapy'/exp OR 'balneotherapy':ab,ti OR 'tai chi':ab,ti OR 'acupuncture':ab,ti OR 'low level laser therapy':ab,ti OR 'pharmacological':ab,ti OR 'biological therapy'/exp OR 'drug therapy'/exp OR 'drug therapy' OR 'monoclonal antibody'/exp OR 'monoclonal antibody' OR 'monokine'/exp OR 'monokine' OR 'biologic*':ab,ti OR 'bdmard*':ab,ti OR 'biosimilar':ab,ti OR 'safe':ab,ti OR 'side effect':ab,ti) AND ('fatigue':ab,ti OR 'tired':ab,ti OR 'exhaust*':ab,ti OR 'asthenia':ab,ti OR 'asthenia' OR 'weak*':ab,ti OR 'letharg*':ab,ti) AND 'fatigue'/exp | 5,098   |
| #2 | #1 AND ('clinical trial topic'/de OR 'cohort analysis'/de OR 'comparative study'/de OR 'controlled clinical trial'/de OR 'observational study'/de OR 'prospective study'/de OR 'randomized controlled trial topic'/de)                                                                                                                                                                                                                                                                                                                                                                                                                                                                                                                                                                                                                                                                                                                                                                                                                                                                                                                                                                                                                                                                                                                                                                                                                                                                                                                                                                                                                                                                                                                                                                                                                                          | 1,018   |

**Cochrane Library:** Searched on 26<sup>th</sup> December 2021

| ID  | Search Terms                                                                                                                                                                                                                                                                                                                                                                                                                                                                                                                                                                                                                                                  | Results |
|-----|---------------------------------------------------------------------------------------------------------------------------------------------------------------------------------------------------------------------------------------------------------------------------------------------------------------------------------------------------------------------------------------------------------------------------------------------------------------------------------------------------------------------------------------------------------------------------------------------------------------------------------------------------------------|---------|
| #1  | (rheumat* OR reumat* OR arthrit* OR artrit* OR psoriatic* OR spondylitis* OR spondyloarthropat* OR spondyloarthritis OR gout OR systemic lupus erythematosus OR lupus OR scleroderma OR systemic sclerosis OR sjogren OR myositis OR dermatomyositis OR polymyositis OR immune-mediated necrotising myopathy OR anti-synthetase syndrome OR inclusion body myositis OR vasculitis OR giant cell arteritis OR Takayasu's arteritis OR polymyalgia rheumatica OR polyarteritis nodosa OR granulomatosis with polyangiitis OR microscopic polyangiitis OR eosinophilic granulomatosis with polyangiitis OR Behçet syndrome OR Wegener OR Churg-Strauss):ti,ab,kw | 40891   |
| #2  | MeSH descriptor: [Arthritis, Rheumatoid] explode all trees                                                                                                                                                                                                                                                                                                                                                                                                                                                                                                                                                                                                    | 6371    |
| #3  | MeSH descriptor: [Arthritis, Psoriatic] explode all trees                                                                                                                                                                                                                                                                                                                                                                                                                                                                                                                                                                                                     | 506     |
| #4  | MeSH descriptor: [Spondylitis, Ankylosing] explode all trees                                                                                                                                                                                                                                                                                                                                                                                                                                                                                                                                                                                                  | 725     |
| #5  | MeSH descriptor: [Gout] explode all trees                                                                                                                                                                                                                                                                                                                                                                                                                                                                                                                                                                                                                     | 405     |
| #6  | MeSH descriptor: [Lupus Erythematosus, Systemic] explode all trees                                                                                                                                                                                                                                                                                                                                                                                                                                                                                                                                                                                            | 1116    |
| #7  | MeSH descriptor: [Scleroderma, Systemic] explode all trees                                                                                                                                                                                                                                                                                                                                                                                                                                                                                                                                                                                                    | 606     |
| #8  | MeSH descriptor: [Sjogren's Syndrome] explode all trees                                                                                                                                                                                                                                                                                                                                                                                                                                                                                                                                                                                                       | 314     |
| #9  | MeSH descriptor: [Myositis] explode all trees                                                                                                                                                                                                                                                                                                                                                                                                                                                                                                                                                                                                                 | 215     |
| #10 | MeSH descriptor: [Vasculitis, Central Nervous System] explode all trees                                                                                                                                                                                                                                                                                                                                                                                                                                                                                                                                                                                       | 103     |
| #11 | (nonpharmacological*OR nonsurgical intervention OR physical activity OR exercise OR occupational therapy OR electro-physical modalities OR thermotherapy OR electrotherapy OR manual therapies OR massage OR orthoses OR devices psychosocial interventions OR Cognitive Behavioral Therapy OR balneotherapy OR tai chi OR acupuncture OR electroacupuncture OR low level laser therapy OR Low-Level Light Therapy OR pharmacological* OR biologic* OR safe OR side effect OR biosimilar* OR bdmard*):ti,ab,kw                                                                                                                                                | 390225  |
| #12 | MeSH descriptor: [Cognitive Behavioral Therapy] explode all trees                                                                                                                                                                                                                                                                                                                                                                                                                                                                                                                                                                                             | 9930    |
| #13 | MeSH descriptor: [Tai Ji] explode all trees                                                                                                                                                                                                                                                                                                                                                                                                                                                                                                                                                                                                                   | 391     |
| #14 | MeSH descriptor: [Acupuncture Therapy] explode all trees                                                                                                                                                                                                                                                                                                                                                                                                                                                                                                                                                                                                      | 5100    |
| #15 | MeSH descriptor: [Low-Level Light Therapy] explode all trees                                                                                                                                                                                                                                                                                                                                                                                                                                                                                                                                                                                                  | 1094    |
| #16 | MeSH descriptor: [Balneology] explode all trees                                                                                                                                                                                                                                                                                                                                                                                                                                                                                                                                                                                                               | 598     |

|     |                                                                                                                                                                                                                               |        |
|-----|-------------------------------------------------------------------------------------------------------------------------------------------------------------------------------------------------------------------------------|--------|
| #17 | MeSH descriptor: [Occupational Therapy] explode all trees                                                                                                                                                                     | 809    |
| #18 | MeSH descriptor: [Massage] explode all trees                                                                                                                                                                                  | 1223   |
| #19 | MeSH descriptor: [Electric Stimulation Therapy] explode all trees                                                                                                                                                             | 7610   |
| #20 | MeSH descriptor: [Hyperthermia, Induced] explode all trees                                                                                                                                                                    | 1763   |
| #21 | MeSH descriptor: [Exercise] explode all trees                                                                                                                                                                                 | 27222  |
| #22 | MeSH descriptor: [Biological Therapy] explode all trees                                                                                                                                                                       | 18550  |
| #23 | MeSH descriptor: [Drug Therapy] explode all trees                                                                                                                                                                             | 145913 |
| #24 | MeSH descriptor: [Antibodies, Monoclonal] explode all trees                                                                                                                                                                   | 14786  |
| #25 | MeSH descriptor: [Monokines] explode all trees                                                                                                                                                                                | 3701   |
| #26 | MeSH descriptor: [Immunoglobulin G] explode all trees                                                                                                                                                                         | 3908   |
| #27 | MeSH descriptor: [Immunoconjugates] explode all trees                                                                                                                                                                         | 423    |
| #28 | MeSH descriptor: [Polyethylene Glycols] explode all trees                                                                                                                                                                     | 3069   |
| #29 | MeSH descriptor: [Immunoglobulin Fab Fragments] explode all trees                                                                                                                                                             | 801    |
| #30 | (fatigue OR tired* OR wear* OR exhaust* OR asthenia OR weak* OR letharg* OR apath*):ti,ab,kw                                                                                                                                  | 71897  |
| #31 | MeSH descriptor: [Asthenia] explode all trees                                                                                                                                                                                 | 82     |
| #32 | MeSH descriptor: [Fatigue] explode all trees                                                                                                                                                                                  | 4058   |
| #33 | (#1 AND #2 OR #3 OR #4 OR #5 OR #6 OR #7 OR #8 OR #9 OR #10) AND (#11 AND #12 OR #13 OR #14 OR #15 OR #16 OR #17 OR #18 OR #19 OR #20 OR #21 OR #22 OR #23 OR #24 OR #25 OR #26 OR #27 OR #28 OR #29) AND (#30 OR #31 OR #32) | 261    |

**CINAHL Complete:** Searched on 27<sup>th</sup> December 2021

| ID | Search Terms                                                                                                                                                                                                                                                                                                                                                                                                                                                                                                                                                                                                                                                                                                                                                                                                                                                                                                                                                                                                                          | Results |
|----|---------------------------------------------------------------------------------------------------------------------------------------------------------------------------------------------------------------------------------------------------------------------------------------------------------------------------------------------------------------------------------------------------------------------------------------------------------------------------------------------------------------------------------------------------------------------------------------------------------------------------------------------------------------------------------------------------------------------------------------------------------------------------------------------------------------------------------------------------------------------------------------------------------------------------------------------------------------------------------------------------------------------------------------|---------|
| S1 | TI (rheumat* OR reumat* OR arthrit* OR artrit* OR psoriatic* OR spondylitis* OR spondyloarthropat* OR spondyloarthritis OR gout OR systemic lupus erythematosus OR lupus OR scleroderma OR systemic sclerosis OR sjogren OR myositis OR dermatomyositis OR polymyositis OR immune-mediated necrotising myopathy OR anti-synthetase syndrome OR inclusion body myositis OR vasculitis OR giant cell arteritis OR Takayasu's arteritis OR polymyalgia rheumatica OR polyarteritis nodosa OR granulomatosis with polyangiitis OR microscopic polyangiitis OR eosinophilic granulomatosis with polyangiitis OR Behçet syndrome OR Wegener OR Churg-Strauss) OR (MH "Arthritis, Rheumatoid") OR (MH "Arthritis, Psoriatic") OR (MH "Spondylitis, Ankylosing") OR (MH "Gout") OR (MH "Lupus Erythematosus, Systemic") OR (MH "Scleroderma, Systemic") OR (MH "Sjogren's Syndrome") OR (MH "Myositis") OR (MH "Vasculitis, Central Nervous System")                                                                                          | 81,944  |
| S2 | TI (nonpharmacological*OR nonsurgical intervention OR physical activity OR exercise OR occupational therapy OR electro-physical modalities OR thermotherapy OR electrotherapy OR manual therapies OR massage OR orthoses OR devices psychosocial interventions OR Cognitive Behavioral Therapy OR balneotherapy OR tai chi OR acupuncture OR electroacupuncture OR low level laser therapy OR Low-Level Light Therapy OR pharmacological* OR biologic* OR safe OR side effect OR biosimilar* OR bdmard*) OR (MH "Cognitive Behavioral Therapy") OR (MH "Tai Ji") OR (MH "Acupuncture Therapy") OR (MH "Low-Level Light Therapy") OR (MH "Balneology") OR (MH "Occupational Therapy") OR (MH "Massage") OR (MH "Electric Stimulation Therapy") OR (MH "Hyperthermia, Induced") OR (MH "Exercise") OR (MH "Biological Therapy") OR (MH "Drug Therapy") OR (MH "Antibodies, Monoclonal") OR (MH "Monokines") OR (MH "Immunoglobulin G") OR (MH "Immunoconjugates") OR (MH "Polyethylene Glycols") OR (MH "Immunoglobulin Fab Fragments") | 275,657 |
| S3 | TI (fatigue OR tired* OR wear* OR exhaust* OR asthenia OR weak* OR letharg* OR apath*) OR (MH "Asthenia") OR (MH "Fatigue")                                                                                                                                                                                                                                                                                                                                                                                                                                                                                                                                                                                                                                                                                                                                                                                                                                                                                                           | 39,862  |
| #4 | S1 AND S2 AND S3                                                                                                                                                                                                                                                                                                                                                                                                                                                                                                                                                                                                                                                                                                                                                                                                                                                                                                                                                                                                                      | 135     |

**PEDro:** Searched on 26<sup>th</sup> December 2021

| <b>ID</b> | <b>Search Terms</b>                                                 | <b>Results</b> |
|-----------|---------------------------------------------------------------------|----------------|
| #1        | Abstract & Title: inflammatory disease AND intervention AND fatigue | 9              |

**OTseeker:** Searched on 26<sup>th</sup> December 2021

| <b>ID</b> | <b>Search Terms</b>                                                                                        | <b>Results</b> |
|-----------|------------------------------------------------------------------------------------------------------------|----------------|
| #1        | [Any Field] like 'inflammatory disease' AND [Any Field] like 'intervention' AND [Any Field] like 'fatigue' | 2              |

**PsycINFO:** Searched on 27<sup>th</sup> December 2021

| ID | Search Terms                                                                                                                                                                                                                                                                                                                                                                                                                                                                                                                                                                                                                                                                                                                                                                                                                                                                                                                                                                                                                                                                                                                                                                                                                                                                                                                               | Results |
|----|--------------------------------------------------------------------------------------------------------------------------------------------------------------------------------------------------------------------------------------------------------------------------------------------------------------------------------------------------------------------------------------------------------------------------------------------------------------------------------------------------------------------------------------------------------------------------------------------------------------------------------------------------------------------------------------------------------------------------------------------------------------------------------------------------------------------------------------------------------------------------------------------------------------------------------------------------------------------------------------------------------------------------------------------------------------------------------------------------------------------------------------------------------------------------------------------------------------------------------------------------------------------------------------------------------------------------------------------|---------|
| #1 | <p>AB ( rheumat* OR reumat* OR arthrit* OR artrit* OR psoriatic* OR spondylitis* OR spondyloarthropat* OR spondyloarthritis OR gout OR systemic lupus erythematosus OR lupus OR scleroderma OR systemic sclerosis OR sjogren OR myositis OR dermatomyositis OR polymyositis OR immune-mediated necrotising myopathy OR anti-synthetase syndrome OR inclusion body myositis OR vasculitis OR giant cell arteritis OR Takayasu's arteritis OR polymyalgia rheumatica OR polyarteritis nodosa OR granulomatosis with polyangiitis OR microscopic polyangiitis OR eosinophilic granulomatosis with polyangiitis OR Behçet syndrome OR Wegener OR Churg-Strauss ) AND AB ( nonpharmacological*OR nonsurgical intervention OR physical activity OR exercise OR occupational therapy OR electro-physical modalities OR thermotherapy OR electrotherapy OR manual therapies OR massage OR orthoses OR devices psychosocial interventions OR Cognitive Behavioral Therapy OR balneotherapy OR tai chi OR acupuncture OR electroacupuncture OR low level laser therapy OR Low-Level Light Therapy OR pharmacological* OR biologic* OR safe OR side effect OR biosimilar* OR bdmard* ) AND AB ( fatigue OR tired* OR wear* OR exhaust* OR astenia OR weak* OR letharg* OR apath* )</p>                                                                | 210     |
| #2 | <p>AB ( rheumat* OR reumat* OR arthrit* OR artrit* OR psoriatic* OR spondylitis* OR spondyloarthropat* OR spondyloarthritis OR gout OR systemic lupus erythematosus OR lupus OR scleroderma OR systemic sclerosis OR sjogren OR myositis OR dermatomyositis OR polymyositis OR immune-mediated necrotising myopathy OR anti-synthetase syndrome OR inclusion body myositis OR vasculitis OR giant cell arteritis OR Takayasu's arteritis OR polymyalgia rheumatica OR polyarteritis nodosa OR granulomatosis with polyangiitis OR microscopic polyangiitis OR eosinophilic granulomatosis with polyangiitis OR Behçet syndrome OR Wegener OR Churg-Strauss ) AND AB ( nonpharmacological*OR nonsurgical intervention OR physical activity OR exercise OR occupational therapy OR electro-physical modalities OR thermotherapy OR electrotherapy OR manual therapies OR massage OR orthoses OR devices psychosocial interventions OR Cognitive Behavioral Therapy OR balneotherapy OR tai chi OR acupuncture OR electroacupuncture OR low level laser therapy OR Low-Level Light Therapy OR pharmacological* OR biologic* OR safe OR side effect OR biosimilar* OR bdmard* ) AND AB ( fatigue OR tired* OR wear* OR exhaust* OR astenia OR weak* OR letharg* OR apath* )</p> <p>Language: English, French, Portuguese, Spanish, Turkish</p> | 210     |
