# Supplementary material for: Efficacy of pharmacological interventions: a systematic review informing the 2023 EULAR recommendations for the management of fatigue in people with inflammatory rheumatic and musculoskeletal diseases
Source: PubMed Central journal article supplement — RMD Open. 2023 Dec 6;9(4):e003349. doi: 10.1136/rmdopen-2023-003349 (PMC10711909; doi:10.1136/rmdopen-2023-003349), 2023-12-06
Supplement: rmdopen-2023-003349supp002.pdf [file rmdopen-2023-003349supp002.pdf]

## Online supplementary material S2: Assessment of risk of bias

Risk of bias of included clinical trials: Review authors' judgements about each risk of bias item of the Cochrane's RoB tool for each study.

|                                 | Random sequence generation (selection bias) | Allocation concealment (selection bias) | Blinding of participants and personnel (performance bias) | Blinding of outcome assessment (detection bias) | Incomplete outcome data (attrition bias) | Selective reporting (reporting bias) | Other bias |
|---------------------------------|---------------------------------------------|-----------------------------------------|-----------------------------------------------------------|-------------------------------------------------|------------------------------------------|--------------------------------------|------------|
| Alten et al., 2011              | +                                           | ?                                       | +                                                         | +                                               | +                                        | +                                    | +          |
| Alten et al., 2015              | +                                           | +                                       | +                                                         | +                                               | +                                        | +                                    | +          |
| Bae et al., 2013                | +                                           | ?                                       | -                                                         | -                                               | +                                        | +                                    | +          |
| Baranauskaite et al., 2012      | +                                           | ?                                       | -                                                         | -                                               | +                                        | +                                    | +          |
| Bingham et al., 2014            | +                                           | +                                       | +                                                         | +                                               | ?                                        | +                                    | +          |
| Bird et al., 2019               | +                                           | ?                                       | +                                                         | +                                               | ?                                        | +                                    | +          |
| Bowman et al., 2017             | +                                           | +                                       | +                                                         | +                                               | +                                        | +                                    | +          |
| Braun et al., 2007              | +                                           | ?                                       | +                                                         | +                                               | +                                        | +                                    | +          |
| Braun et al., 2009              | +                                           | ?                                       | ?                                                         | ?                                               | ?                                        | +                                    | +          |
| Burmester et al., 2013          | +                                           | +                                       | +                                                         | +                                               | +                                        | +                                    | +          |
| Calin et al., 2004              | +                                           | ?                                       | +                                                         | +                                               | +                                        | +                                    | +          |
| Chung et al., 2007              | +                                           | +                                       | +                                                         | +                                               | +                                        | +                                    | +          |
| Cohen et al., 2006              | +                                           | ?                                       | +                                                         | +                                               | +                                        | +                                    | +          |
| Dass et al., 2008               | +                                           | +                                       | +                                                         | +                                               | ?                                        | +                                    | +          |
| Deodhar, et al. 2016            | +                                           | +                                       | +                                                         | +                                               | ?                                        | +                                    | +          |
| Deodhar, et al. 2019            | +                                           | +                                       | +                                                         | +                                               | ?                                        | +                                    | +          |
| Deodhar, et al. 2021            | +                                           | ?                                       | +                                                         | +                                               | ?                                        | +                                    | +          |
| Devauchelle-Pensec et al., 2014 | +                                           | +                                       | +                                                         | +                                               | +                                        | +                                    | +          |
| Dörner et al., 2019             | +                                           | +                                       | +                                                         | +                                               | ?                                        | +                                    | +          |
| Dougados et al., 2015           | +                                           | ?                                       | +                                                         | +                                               | +                                        | +                                    | +          |
| Emery et al., 2006              | +                                           | +                                       | +                                                         | +                                               | +                                        | +                                    | +          |
| Fleischmann et al., 2009        | +                                           | +                                       | +                                                         | +                                               | +                                        | +                                    | +          |
| Genovese et al., 2007           | +                                           | +                                       | +                                                         | +                                               | +                                        | +                                    | +          |

|                             | Random sequence generation (selection bias) | Allocation concealment (selection bias) | Blinding of participants and personnel (performance bias) | Blinding of outcome assessment (detection bias) | Incomplete outcome data (attrition bias) | Selective reporting (reporting bias) | Other bias |
|-----------------------------|---------------------------------------------|-----------------------------------------|-----------------------------------------------------------|-------------------------------------------------|------------------------------------------|--------------------------------------|------------|
| Genovese et al., 2008       | +                                           | +                                       | +                                                         | +                                               | +                                        | +                                    | +          |
| Genovese et al., 2012       | +                                           | +                                       | +                                                         | +                                               | +                                        | +                                    | +          |
| Genovese et al., 2018       | +                                           | ?                                       | +                                                         | +                                               | +                                        | +                                    | +          |
| Genovese et al., 2019       | +                                           | +                                       | +                                                         | +                                               | +                                        | +                                    | +          |
| Ghiti Moghadam et al., 2018 | +                                           | ?                                       | -                                                         | -                                               | +                                        | +                                    | +          |
| Gladman et al., 2007        | +                                           | +                                       | +                                                         | +                                               | +                                        | +                                    | +          |
| Gladman et al., 2014        | +                                           | +                                       | +                                                         | +                                               | +                                        | +                                    | +          |
| Gottenberg et al., 2014     | +                                           | +                                       | +                                                         | +                                               | +                                        | +                                    | +          |
| Hammoudeh et al., 2013      | +                                           | +                                       | +                                                         | +                                               | ?                                        | +                                    | +          |
| Hartkamp et al., 2010       | +                                           | +                                       | +                                                         | +                                               | +                                        | +                                    | +          |
| Hartkamp et al., 2015       | +                                           | +                                       | +                                                         | +                                               | +                                        | +                                    | +          |
| Jenks et al., 2010          | +                                           | +                                       | +                                                         | +                                               | ?                                        | +                                    | +          |
| Kekow et al., 2010          | +                                           | +                                       | +                                                         | ?                                               | +                                        | -                                    | +          |
| Keystone et al., 2008       | +                                           | ?                                       | +                                                         | ?                                               | +                                        | +                                    | +          |
| Keystone et al., 2017       | +                                           | ?                                       | +                                                         | +                                               | +                                        | +                                    | +          |
| Khanna et al., 2016         | +                                           | +                                       | +                                                         | +                                               | +                                        | +                                    | +          |
| Kruize et al., 1993         | +                                           | ?                                       | +                                                         | ?                                               | ?                                        | -                                    | +          |
| Lai et al., 2012            | +                                           | +                                       | +                                                         | +                                               | ?                                        | +                                    | +          |
| Li et al., 2015             | +                                           | ?                                       | +                                                         | ?                                               | +                                        | +                                    | +          |
| Li et al., 2020             | +                                           | +                                       | +                                                         | +                                               | +                                        | +                                    | +          |
| Li et al., 2021             | +                                           | +                                       | +                                                         | +                                               | +                                        | +                                    | +          |
| Liu et al., 2019            | +                                           | +                                       | +                                                         | +                                               | +                                        | +                                    | +          |
| Mariette et al., 2004       | +                                           | ?                                       | +                                                         | ?                                               | +                                        | +                                    | +          |
| Marzo-Ortega et al., 2017   | +                                           | ?                                       | +                                                         | +                                               | ?                                        | +                                    | +          |
| Mease et al., 2008          | +                                           | +                                       | +                                                         | +                                               | +                                        | +                                    | +          |
| Meijer et al., 2010         | +                                           | +                                       | +                                                         | ?                                               | ?                                        | +                                    | +          |

|                         | Random sequence generation (selection bias) | Allocation concealment (selection bias) | Blinding of participants and personnel (performance bias) | Blinding of outcome assessment (detection bias) | Incomplete outcome data (attrition bias) | Selective reporting (reporting bias) | Other bias |
|-------------------------|---------------------------------------------|-----------------------------------------|-----------------------------------------------------------|-------------------------------------------------|------------------------------------------|--------------------------------------|------------|
| Merrill et al., 2010    | +                                           | ?                                       | +                                                         | +                                               | +                                        | +                                    | +          |
| Merrill et al., 2016    | +                                           | +                                       | +                                                         | +                                               | +                                        | +                                    | +          |
| Mittendorf et al., 2007 | +                                           | ?                                       | ?                                                         | ?                                               | +                                        | +                                    | +          |
| Moreland et al., 2006   | +                                           | +                                       | +                                                         | ?                                               | ?                                        | +                                    | +          |
| Norheim et al., 2012    | +                                           | +                                       | +                                                         | +                                               | ?                                        | +                                    | +          |
| Petri et al., 2017      | +                                           | +                                       | +                                                         | +                                               | +                                        | +                                    | +          |
| Pincus et al., 2008     | +                                           | +                                       | +                                                         | +                                               | +                                        | +                                    | +          |
| Pope et al., 2015       | +                                           | ?                                       | +                                                         | ?                                               | -                                        | +                                    | +          |
| Posada et al., 2021     | +                                           | ?                                       | -                                                         | -                                               | ?                                        | +                                    | +          |
| Revicki et al., 2008    | +                                           | +                                       | +                                                         | +                                               | +                                        | +                                    | +          |
| Rigby et al., 2011      | +                                           | +                                       | +                                                         | ?                                               | +                                        | +                                    | +          |
| Ritchlin et al., 2014   | +                                           | +                                       | +                                                         | +                                               | +                                        | +                                    | +          |
| Russell et al., 2007    | +                                           | ?                                       | +                                                         | ?                                               | +                                        | +                                    | +          |
| Schiff et al., 2017     | +                                           | ?                                       | +                                                         | ?                                               | +                                        | +                                    | +          |
| Seitsalo et al., 2007   | +                                           | +                                       | +                                                         | ?                                               | +                                        | ?                                    | +          |
| Sieper et al., 2015     | +                                           | +                                       | +                                                         | ?                                               | ?                                        | +                                    | +          |
| Smolen et al., 2008     | +                                           | +                                       | +                                                         | +                                               | +                                        | +                                    | +          |
| Smolen et al., 2009     | +                                           | +                                       | +                                                         | +                                               | +                                        | +                                    | +          |
| Smolen et al., 2017     | +                                           | +                                       | +                                                         | +                                               | ?                                        | +                                    | +          |
| Stohl et al., 2017      | +                                           | ?                                       | +                                                         | ?                                               | +                                        | +                                    | +          |
| Strand et al., 2009     | +                                           | +                                       | +                                                         | ?                                               | +                                        | +                                    | +          |
| Strand et al., 2011     | +                                           | +                                       | +                                                         | -                                               | +                                        | +                                    | +          |
| Strand et al., 2012a    | +                                           | +                                       | +                                                         | ?                                               | +                                        | +                                    | +          |
| Strand et al., 2012b    | +                                           | ?                                       | ?                                                         | ?                                               | +                                        | -                                    | +          |
| Strand et al., 2014a    | +                                           | ?                                       | -                                                         | -                                               | -                                        | ?                                    | +          |
| Strand et al., 2014b    | +                                           | ?                                       | +                                                         | -                                               | ?                                        | +                                    | +          |

|                         | Random sequence generation (selection bias) | Allocation concealment (selection bias) | Blinding of participants and personnel (performance bias) | Blinding of outcome assessment (detection bias) | Incomplete outcome data (attrition bias) | Selective reporting (reporting bias) | Other bias |
|-------------------------|---------------------------------------------|-----------------------------------------|-----------------------------------------------------------|-------------------------------------------------|------------------------------------------|--------------------------------------|------------|
| Strand et al., 2016a    | +                                           | +                                       | +                                                         | ?                                               | +                                        | ?                                    | +          |
| Strand et al., 2016b    | +                                           | ?                                       | +                                                         | +                                               | ?                                        | +                                    | +          |
| Strand et al., 2016c    | +                                           | ?                                       | +                                                         | ?                                               | ?                                        | ?                                    | +          |
| Strand et al., 2017a    | +                                           | +                                       | +                                                         | +                                               | ?                                        | +                                    | +          |
| Strand et al., 2017b    | +                                           | ?                                       | +                                                         | +                                               | +                                        | +                                    | +          |
| Strand et al., 2018a    | +                                           | ?                                       | +                                                         | +                                               | +                                        | ?                                    | +          |
| Strand et al., 2018b    | +                                           | ?                                       | +                                                         | -                                               | +                                        | ?                                    | +          |
| Strand et al., 2019a    | +                                           | +                                       | +                                                         | +                                               | ?                                        | ?                                    | +          |
| Strand et al., 2019b    | +                                           | +                                       | +                                                         | +                                               | +                                        | ?                                    | +          |
| Strand et al., 2019c    | +                                           | +                                       | +                                                         | +                                               | ?                                        | ?                                    | +          |
| Strand et al., 2019d    | +                                           | ?                                       | +                                                         | +                                               | ?                                        | ?                                    | +          |
| Strand et al., 2020     | +                                           | +                                       | +                                                         | +                                               | ?                                        | ?                                    | +          |
| Strand et al., 2021a    | +                                           | ?                                       | +                                                         | +                                               | ?                                        | +                                    | +          |
| Strand et al., 2021b    | +                                           | ?                                       | +                                                         | +                                               | ?                                        | +                                    | +          |
| Teitsma et al., 2017    | +                                           | ?                                       | +                                                         | +                                               | +                                        | +                                    | +          |
| Theander et al., 2002   | +                                           | ?                                       | +                                                         | +                                               | -                                        | ?                                    | +          |
| Virkki et al., 2010     | +                                           | +                                       | +                                                         | +                                               | +                                        | +                                    | +          |
| Wanders et al., 2004    | +                                           | ?                                       | +                                                         | ?                                               | +                                        | ?                                    | +          |
| Weinblatt et al., 2003  | +                                           | ?                                       | +                                                         | +                                               | +                                        | ?                                    | +          |
| Wells et al., 2007      | +                                           | ?                                       | +                                                         | -                                               | ?                                        | ?                                    | +          |
| Westhovens et al., 2006 | +                                           | ?                                       | +                                                         | +                                               | +                                        | +                                    | +          |
| Yokogawa et al., 2017   | +                                           | +                                       | +                                                         | +                                               | -                                        | +                                    | +          |
| Yount et al., 2007      | +                                           | ?                                       | +                                                         | -                                               | +                                        | -                                    | +          |
| Zhanguo Li et al., 2018 | +                                           | ?                                       | +                                                         | +                                               | ?                                        | ?                                    | +          |
